# Supplementary material for: APEX2 Proximity Proteomics Resolves Flagellum Subdomains and Identifies Flagellum Tip-Specific Proteins in Trypanosoma brucei
Source: PubMed Central journal article supplement (PMC8141408; doi:10.1128/msphere.01090-20), 2021-02-10
Supplement: mSphere.01090-20-st001.pdf [file mSphere.01090-20-st001.pdf]

**Supplemental Table S1A. Proteins in the DRC1p proximity proteome that were not identified in prior flagellum proteome studies.**

| <b>Accession</b> | <b>Description</b>                                      | <b>Accession</b> | <b>Description</b>                                                                                     |
|------------------|---------------------------------------------------------|------------------|--------------------------------------------------------------------------------------------------------|
| Tb927.1.1010     | E3 ubiquitin-protein ligase KCMF1, putative             | Tb927.3.2760     | hypothetical protein, conserved                                                                        |
| Tb927.1.1100     | Basal body protein                                      | Tb927.3.2830     | brix domain containing protein, putative                                                               |
| Tb927.1.1840     | conserved protein, unknown function                     | Tb927.3.2950     | ribonuclease inhibitor- like protein                                                                   |
| Tb927.1.2640     | hypothetical protein, conserved                         | Tb927.3.3120     | hypothetical protein, conserved                                                                        |
| Tb927.1.3250     | Domain of unknown function (DUF4456), putative          | Tb927.3.3350     | hypothetical protein, conserved                                                                        |
| Tb927.1.4300     | chaperone protein DnaJ, putative                        | Tb927.3.3650     | hypothetical protein, conserved                                                                        |
| Tb927.1.4420     | ABC transporter, putative                               | Tb927.3.4020     | phosphatidylinositol 4-kinase alpha, putative                                                          |
| Tb927.1.690      | hypothetical protein, conserved                         | Tb927.3.4510     | hypothetical protein, conserved                                                                        |
| Tb927.1.780      | leucine-rich repeat-containing protein                  | Tb927.3.4610     | Right handed beta helix region, putative                                                               |
| Tb927.10.10090   | Component of motile flagella 14                         | Tb927.3.4790     | Aminopeptidase M1, putative                                                                            |
| Tb927.10.11070   | hypothetical protein, conserved                         | Tb927.3.5040     | hypothetical protein, conserved                                                                        |
| Tb927.10.1120    | hypothetical protein, conserved                         | Tb927.3.5110     | hypothetical protein, conserved                                                                        |
| Tb927.10.1150    | hypothetical protein, conserved                         | Tb927.3.5120     | Ankyrin repeats (3 copies), putative                                                                   |
| Tb927.10.11550   | hypothetical protein, conserved                         | Tb927.3.5160     | Basal body protein                                                                                     |
| Tb927.10.12490   | kinesin, putative                                       | Tb927.3.5260     | hypothetical protein, conserved                                                                        |
| Tb927.10.12870   | Basal body protein                                      | Tb927.3.690      | CMGC/RCK protein kinase, putative                                                                      |
| Tb927.10.13000   | cAMP phosphodiesterase A, putative                      | Tb927.3.730      | hypothetical protein, conserved                                                                        |
| Tb927.10.13030   | cysteine peptidase, Clan CA, family C2, putative        | Tb927.3.920      | hypothetical protein, conserved                                                                        |
| Tb927.10.13150   | hypothetical protein, conserved                         | Tb927.4.1150     | hypothetical protein, conserved                                                                        |
| Tb927.10.13610   | zinc-finger of a C2HC-type/Double zinc ribbon, putative | Tb927.4.1430     | hypothetical protein, conserved                                                                        |
| Tb927.10.13870   | tubulin tyrosine ligase protein, putative               | Tb927.4.1750     | hypothetical protein, conserved                                                                        |
| Tb927.10.14220   | hypothetical protein, conserved                         | Tb927.4.2240     | Aminotransferase class IV, putative                                                                    |
| Tb927.10.14230   | hypothetical protein, conserved                         | Tb927.4.2640     | hypothetical protein, conserved                                                                        |
| Tb927.10.14300   | MEKK-related kinase 1, putative                         | Tb927.4.2730     | kinesin, putative                                                                                      |
| Tb927.10.14420   | Serine/threonine-protein kinase NEK16, putative         | Tb927.4.2880     | Nucleoporin NUP225                                                                                     |
| Tb927.10.14480   | hypothetical protein, conserved                         | Tb927.4.2990     | hypothetical protein, conserved                                                                        |
| Tb927.10.14730   | chaperone protein DnaJ, putative                        | Tb927.4.3470     | hypothetical protein, conserved                                                                        |
| Tb927.10.1510    | CCR4-NOT transcription complex subunit 1                | Tb927.4.3770     | calcium/calmodulin-dependent protein kinase, putative                                                  |
| Tb927.10.15230   | hypothetical protein, conserved                         | Tb927.4.3810     | DNA-directed RNA polymerase II subunit 2, putative                                                     |
| Tb927.10.15450   | hypothetical protein, conserved                         | Tb927.4.3890     | ATP-dependent RNA helicase, putative                                                                   |
| Tb927.10.15550   | hypothetical protein, conserved                         | Tb927.4.4400     | hypothetical protein, conserved                                                                        |
| Tb927.10.15660   | hypothetical protein, conserved                         | Tb927.4.850      | hypothetical protein, conserved                                                                        |
| Tb927.10.15680   | hypothetical protein, conserved                         | Tb927.5.1010     | hypothetical protein, conserved                                                                        |
| Tb927.10.15730   | SPRY domain/Ankyrin repeats (3 copies), putative        | Tb927.5.1140     | choline/ethanolamine kinase                                                                            |
| Tb927.10.1630    | atp-binding cassette sub-family e member 1              | Tb927.5.1540     | hypothetical protein, conserved                                                                        |
| Tb927.10.1980    | hypothetical protein, conserved                         | Tb927.5.1920     | hypothetical protein, conserved                                                                        |
| Tb927.10.2650    | hypothetical protein, conserved                         | Tb927.5.2410     | kinesin, putative                                                                                      |
| Tb927.10.2900    | importin beta-1 subunit, putative                       | Tb927.5.2620     | hypothetical protein, conserved                                                                        |
| Tb927.10.2920    | SUMO-interacting motif-containing protein               | Tb927.5.2680     | hypothetical protein, conserved                                                                        |
| Tb927.10.3010    | hook complex protein, conserved                         | Tb927.5.2890     | AAA domain (dynein-related subfamily)/von Willebrand factor type A domain containing protein, putative |
| Tb927.10.3780    | hypothetical protein, conserved                         | Tb927.5.3230     | hypothetical protein, conserved                                                                        |
| Tb927.10.3790    | hypothetical protein, conserved                         | Tb927.5.3290     | Protein of unknown function, putative                                                                  |
| Tb927.10.3870    | hypothetical protein, conserved                         | Tb927.5.3330     | hypothetical protein, conserved                                                                        |
| Tb927.10.4290    | hypothetical protein, conserved                         | Tb927.5.3650     | hypothetical protein, conserved                                                                        |
| Tb927.10.4320    | hypothetical protein, conserved                         | Tb927.5.4110     | hypothetical protein, conserved                                                                        |

|                |                                                                                                             |              |                                                                    |
|----------------|-------------------------------------------------------------------------------------------------------------|--------------|--------------------------------------------------------------------|
| Tb927.10.4600  | predicted SET domain protein                                                                                | Tb927.5.4380 | Kinetoplastid-specific Protein Phosphatase 1                       |
| Tb927.10.4750  | hypothetical protein, conserved                                                                             | Tb927.5.4400 | hypothetical protein, conserved                                    |
| Tb927.10.4890  | zinc-finger of a C2HC-type, putative                                                                        | Tb927.5.570  | hypothetical protein, conserved                                    |
| Tb927.10.4920  | hypothetical protein, conserved                                                                             | Tb927.5.950  | monothiol glutaredoxin, putative                                   |
| Tb927.10.4940  | Nuclear Dbf2-related kinase                                                                                 | Tb927.6.1480 | hypothetical protein, conserved                                    |
| Tb927.10.5000  | hypothetical protein, conserved                                                                             | Tb927.6.2120 | hypothetical protein, conserved                                    |
| Tb927.10.5170  | XPC-binding domain containing protein, putative                                                             | Tb927.6.2690 | ubiquitin carboxyl-terminal hydrolase, putative                    |
| Tb927.10.5240  | cAMP binding protein, putative                                                                              | Tb927.6.2760 | hypothetical protein, conserved                                    |
| Tb927.10.5380  | intraflagellar transport protein 122                                                                        | Tb927.6.2850 | ESAG8-associated protein, putative                                 |
| Tb927.10.5460  | 60S ribosomal protein L24, putative                                                                         | Tb927.6.3020 | hypothetical protein, conserved                                    |
| Tb927.10.5480  | 60S ribosomal protein L24, putative                                                                         | Tb927.6.3100 | Intraflagellar transport complex B protein 46 C terminal, putative |
| Tb927.10.5580  | hypothetical protein, conserved                                                                             | Tb927.6.3310 | cysteine peptidase, Clan CA, family C2, putative                   |
| Tb927.10.5890  | Galactose oxidase, central domain containing protein, putative                                              | Tb927.6.4640 | hypothetical protein, conserved                                    |
| Tb927.10.5930  | NEK family Serine/threonine-protein kinase, putative                                                        | Tb927.6.4750 | hypothetical protein, conserved                                    |
| Tb927.10.6000  | hypothetical protein, conserved                                                                             | Tb927.7.1230 | hypothetical protein, conserved                                    |
| Tb927.10.6110  | hypothetical protein, conserved                                                                             | Tb927.7.1240 | Sphingosine kinase                                                 |
| Tb927.10.6210  | TPR repeat, putative                                                                                        | Tb927.7.1560 | TPR repeat, putative                                               |
| Tb927.10.6230  | MORN repeat containing protein                                                                              | Tb927.7.1760 | hypothetical protein, conserved                                    |
| Tb927.10.6330  | kinetoplastid kinetochore protein 1                                                                         | Tb927.7.1870 | hypothetical protein, conserved                                    |
| Tb927.10.6340  | hypothetical protein, conserved                                                                             | Tb927.7.2280 | hypothetical protein, conserved                                    |
| Tb927.10.6580  | hypothetical protein                                                                                        | Tb927.7.2350 | hypothetical protein, conserved                                    |
| Tb927.10.6980  | caltractin, putative                                                                                        | Tb927.7.2730 | leucine-rich repeat protein (LRRP), putative                       |
| Tb927.10.7830  | hypothetical protein, conserved                                                                             | Tb927.7.2810 | hypothetical protein, conserved                                    |
| Tb927.10.820   | hypothetical protein, conserved                                                                             | Tb927.7.290  | leucine-rich repeat protein 1 (LRRP1), putative                    |
| Tb927.10.8390  | Concanavalin A-like lectin/glucanases superfamily/SPRY domain/HECT-domain (ubiquitin-transferase), putative | Tb927.7.3000 | kinesin, putative                                                  |
| Tb927.10.8910  | Nucleoporin NUP181                                                                                          | Tb927.7.3130 | Transition Zone Protein 103 kDa                                    |
| Tb927.10.930   | hypothetical protein, conserved                                                                             | Tb927.7.3400 | MORN repeat, putative                                              |
| Tb927.10.9380  | SEP domain/UBX domain containing protein, putative                                                          | Tb927.7.3540 | hypothetical protein, conserved                                    |
| Tb927.10.970   | Tetratricopeptide repeat, putative                                                                          | Tb927.7.3580 | Serine/threonine-protein kinase NEK11, putative                    |
| Tb927.11.10120 | hypothetical protein, conserved                                                                             | Tb927.7.3610 | hypothetical protein, conserved                                    |
| Tb927.11.10210 | hypothetical protein, conserved                                                                             | Tb927.7.3670 | TrkA-N domain containing protein, putative                         |
| Tb927.11.1030  | kinetoplastid kinetochore protein 7                                                                         | Tb927.7.3880 | Basal body protein                                                 |
| Tb927.11.10350 | hypothetical protein, conserved                                                                             | Tb927.7.4130 | hypothetical protein, conserved                                    |
| Tb927.11.10360 | hypothetical protein, conserved                                                                             | Tb927.7.4360 | hypothetical protein, conserved                                    |
| Tb927.11.10520 | kinetoplastid kinetochore protein 2                                                                         | Tb927.7.4370 | hypothetical protein, conserved                                    |
| Tb927.11.10560 | eukaryotic translation initiation factor 4 gamma 4                                                          | Tb927.7.4410 | hypothetical protein, conserved                                    |
| Tb927.11.10610 | hypothetical protein, conserved                                                                             | Tb927.7.4600 | Calponin homology (CH) domain containing protein, putative         |
| Tb927.11.10660 | Basal body protein                                                                                          | Tb927.7.4900 | 5'-3' exoribonuclease A                                            |
| Tb927.11.11090 | Nucleoporin NUP140                                                                                          | Tb927.7.500  | hypothetical protein, conserved                                    |
| Tb927.11.1110  | calpain, putative                                                                                           | Tb927.7.510  | hypothetical protein, conserved                                    |
| Tb927.11.11260 | hypothetical protein, conserved                                                                             | Tb927.7.5410 | hypothetical protein, conserved                                    |
| Tb927.11.1130  | calpain-like cysteine peptidase, putative                                                                   | Tb927.7.5430 | hypothetical protein, conserved                                    |
| Tb927.11.11600 | hypothetical protein, conserved                                                                             | Tb927.7.6220 | calcium/calmodulin-dependent protein kinase, putative              |
| Tb927.11.11880 | conserved protein                                                                                           | Tb927.7.6310 | polo-like protein kinase                                           |
| Tb927.11.1220  | hypothetical protein, conserved                                                                             | Tb927.7.6680 | STE/STE11 serine/threonine-protein kinase, putative                |
| Tb927.11.12430 | cell division cycle phosphatase 14, putative                                                                | Tb927.7.6760 | hypothetical protein, conserved                                    |

|                |                                                                                                             |               |                                                                |
|----------------|-------------------------------------------------------------------------------------------------------------|---------------|----------------------------------------------------------------|
| Tb927.11.12510 | hypothetical protein, conserved                                                                             | Tb927.7.7000  | hook complex protein, conserved                                |
| Tb927.11.12970 | hypothetical protein, conserved                                                                             | Tb927.7.7070  | MYND finger, putative                                          |
| Tb927.11.13360 | AAA ATPase, putative                                                                                        | Tb927.7.7100  | hypothetical protein                                           |
| Tb927.11.13450 | hypothetical protein, conserved                                                                             | Tb927.7.7190  | hypothetical protein, conserved                                |
| Tb927.11.13490 | hypothetical protein, conserved                                                                             | Tb927.7.7260  | kinesin, putative                                              |
| Tb927.11.1380  | Right handed beta helix region/Periplasmic copper-binding protein (NosD), putative                          | Tb927.7.7320  | hypothetical protein, conserved                                |
| Tb927.11.13840 | hypothetical protein, conserved                                                                             | Tb927.7.7400  | Basal body protein                                             |
| Tb927.11.13920 | kinesin-II 85 Kd subunit, putative                                                                          | Tb927.7.860   | hypothetical protein, conserved                                |
| Tb927.11.14220 | Regulator of ESAG9-1                                                                                        | Tb927.8.1080  | centrin, putative                                              |
| Tb927.11.14410 | Ankyrin repeats (3 copies), putative                                                                        | Tb927.8.1280  | hypothetical protein, conserved                                |
| Tb927.11.14680 | phosphatidylinositol 3-related kinase, putative                                                             | Tb927.8.1360  | Dynein heavy chain, N-terminal region 2, putative              |
| Tb927.11.14920 | hypothetical protein, conserved                                                                             | Tb927.8.1890  | cytochrome c1, heme protein, mitochondrial, putative           |
| Tb927.11.15250 | hypothetical protein, conserved                                                                             | Tb927.8.2220  | hypothetical protein, conserved                                |
| Tb927.11.15310 | hypothetical protein, conserved                                                                             | Tb927.8.2440  | hypothetical protein, conserved                                |
| Tb927.11.15450 | Basal body protein                                                                                          | Tb927.8.2590  | Basal body protein                                             |
| Tb927.11.15610 | hypothetical protein, conserved                                                                             | Tb927.8.2660  | Galactose oxidase, central domain containing protein, putative |
| Tb927.11.15740 | hypothetical protein, conserved                                                                             | Tb927.8.2870  | conserved protein                                              |
| Tb927.11.15750 | AMP deaminase, putative                                                                                     | Tb927.8.3000  | hypothetical protein, conserved                                |
| Tb927.11.15940 | hypothetical protein, conserved                                                                             | Tb927.8.3010  | hook complex protein, conserved                                |
| Tb927.11.16210 | cAMP response protein 1, putative                                                                           | Tb927.8.3410  | Inositol hexakisphosphate, putative                            |
| Tb927.11.16790 | mitogen-activated protein kinase                                                                            | Tb927.8.3590  | hypothetical protein, conserved                                |
| Tb927.11.2290  | hypothetical protein, conserved                                                                             | Tb927.8.3700  | hypothetical protein, conserved                                |
| Tb927.11.2590  | Flagellum attachment zone protein 12                                                                        | Tb927.8.3990  | hypothetical protein, conserved                                |
| Tb927.11.3110  | hypothetical protein, conserved                                                                             | Tb927.8.4100  | FLA1-binding protein                                           |
| Tb927.11.3140  | dual specificity tyrosine-phosphorylation-regulated kinase 2, putative                                      | Tb927.8.4160  | hypothetical protein, conserved                                |
| Tb927.11.3390  | Concanavalin A-like lectin/glucanases superfamily/SPRY domain/HECT-domain (ubiquitin-transferase), putative | Tb927.8.4320  | hypothetical protein, conserved                                |
| Tb927.11.3680  | calmodulin, putative                                                                                        | Tb927.8.4480  | hypothetical protein, conserved                                |
| Tb927.11.3910  | hypothetical protein, conserved                                                                             | Tb927.8.4510  | Nucleoside diphosphate kinase 4                                |
| Tb927.11.3990  | hypothetical protein, conserved                                                                             | Tb927.8.4590  | hypothetical protein, conserved                                |
| Tb927.11.4010  | hypothetical protein, conserved                                                                             | Tb927.8.4910  | hypothetical protein, conserved                                |
| Tb927.11.4210  | U-box domain containing protein, putative                                                                   | Tb927.8.5020  | hypothetical protein, conserved                                |
| Tb927.11.4280  | hypothetical protein, conserved                                                                             | Tb927.8.5110  | hypothetical protein, conserved                                |
| Tb927.11.4350  | SUMO-interacting motif-containing protein                                                                   | Tb927.8.5170  | hypothetical protein, conserved                                |
| Tb927.11.4540  | Nucleoporin NUP48                                                                                           | Tb927.8.5290  | WW domain containing protein, putative                         |
| Tb927.11.4660  | Kinesin-13 2                                                                                                | Tb927.8.5940  | hypothetical protein, conserved                                |
| Tb927.11.4720  | hypothetical protein, conserved                                                                             | Tb927.8.5970  | Cullin 5, putative                                             |
| Tb927.11.4740  | paraflagellar rod component, putative                                                                       | Tb927.8.6250  | Nucleoporin NUP76                                              |
| Tb927.11.4950  | hypothetical protein, conserved                                                                             | Tb927.8.6490  | Basal body protein                                             |
| Tb927.11.5040  | leucine-rich repeat protein (LRRP), putative                                                                | Tb927.8.6650  | RNA-binding protein, putative                                  |
| Tb927.11.5190  | leucine-rich repeat protein (LRRP), putative                                                                | Tb927.8.6790  | hypothetical protein, conserved                                |
| Tb927.11.5250  | hypothetical protein, conserved                                                                             | Tb927.8.6830  | kinesin, putative                                              |
| Tb927.11.560   | hypothetical protein, conserved                                                                             | Tb927.8.6870  | hypothetical protein, conserved                                |
| Tb927.11.5660  | hypothetical protein, conserved                                                                             | Tb927.8.6940  | hypothetical protein, conserved                                |
| Tb927.11.5770  | hypothetical protein, conserved                                                                             | Tb927.8.7060  | hypothetical protein, conserved                                |
| Tb927.11.630   | RNA polymerase I second largest subunit                                                                     | Tb927.8.7080  | hypothetical protein, conserved                                |
| Tb927.11.6350  | AAA ATPase, putative                                                                                        | Tb927.8.790   | hypothetical protein, conserved                                |
| Tb927.11.6430  | hypothetical protein, conserved                                                                             | Tb927.8.7970  | hypothetical protein                                           |
| Tb927.11.6780  | regulator of chromatin condensation, putative                                                               | Tb927.8.8070  | conserved protein                                              |
| Tb927.11.6820  | hypothetical protein, conserved                                                                             | Tb927.8.960   | hypothetical protein, conserved                                |
| Tb927.11.7180  | MORN repeat, putative                                                                                       | Tb927.9.10530 | Flagellum attachment zone protein 4                            |

|               |                                                               |               |                                                                                                       |
|---------------|---------------------------------------------------------------|---------------|-------------------------------------------------------------------------------------------------------|
| Tb927.11.7670 | Cornifin (SPRR) family, putative                              | Tb927.9.10950 | chaperone protein DnaJ, putative                                                                      |
| Tb927.11.8210 | RAD50 DNA repair-like protein                                 | Tb927.9.12490 | hypothetical protein, conserved                                                                       |
| Tb927.11.8290 | DIS3-like exonuclease, putative                               | Tb927.9.12800 | hypothetical protein, conserved                                                                       |
| Tb927.11.8300 | hypothetical protein, conserved                               | Tb927.9.13300 | Ring finger domain containing protein, putative                                                       |
| Tb927.11.8410 | hypothetical protein, conserved                               | Tb927.9.13610 | helicase, putative                                                                                    |
| Tb927.11.910  | hypothetical protein, conserved                               | Tb927.9.14220 | metacaspase 5, putative                                                                               |
| Tb927.11.9220 | proteasome regulatory non-ATP-ase subunit 2                   | Tb927.9.15400 | ankyrin-repeat protein, putative                                                                      |
| Tb927.11.9240 | hypothetical protein, conserved                               | Tb927.9.1770  | Zn-finger in Ran binding protein and others/SPRY domain/HECT-domain (ubiquitin-transferase), putative |
| Tb927.11.9370 | hypothetical protein, conserved                               | Tb927.9.2130  | hypothetical protein, conserved                                                                       |
| Tb927.11.9650 | hypothetical protein, conserved                               | Tb927.9.2900  | U3 small nucleolar RNA-associated protein 10, putative                                                |
| Tb927.11.9680 | hypothetical protein, conserved                               | Tb927.9.3030  | hypothetical protein, conserved                                                                       |
| Tb927.11.9780 | Nucleoporin NUP119                                            | Tb927.9.3120  | STE/STE11 serine/threonine-protein kinase, putative                                                   |
| Tb927.11.9880 | Protein of unknown function (DUF2009), putative               | Tb927.9.3130  | hypothetical protein, conserved                                                                       |
| Tb927.2.2090  | SUMO-interacting motif-containing protein                     | Tb927.9.3400  | endo-beta-N-acetylglucosaminidase, putative                                                           |
| Tb927.2.2880  | TPR repeat/Tetratricopeptide repeat, putative                 | Tb927.9.3680  | hypothetical protein, conserved                                                                       |
| Tb927.2.3000  | hypothetical protein, conserved                               | Tb927.9.3870  | hypothetical protein, conserved                                                                       |
| Tb927.2.3730  | hypothetical protein, conserved                               | Tb927.9.4420  | Beat-regulation protein                                                                               |
| Tb927.2.4160  | hypothetical protein, conserved                               | Tb927.9.5520  | ubiquitin carboxyl-terminal hydrolase, putative                                                       |
| Tb927.2.4200  | CMGC/CLK family protein kinase, putative                      | Tb927.9.5620  | hypothetical protein, conserved                                                                       |
| Tb927.2.4480  | hypothetical protein, conserved                               | Tb927.9.6350  | inositol-1(or 4)-monophosphatase, putative                                                            |
| Tb927.2.4780  | hypothetical protein, conserved                               | Tb927.9.6460  | hypothetical protein, conserved                                                                       |
| Tb927.2.4930  | esterase, putative                                            | Tb927.9.6880  | cAMP-specific phosphodiesterase, putative                                                             |
| Tb927.2.5010  | Meiotic cell cortex C-terminal pleckstrin homology, putative  | Tb927.9.7690  | SUMO-interacting motif-containing protein                                                             |
| Tb927.2.5220  | hypothetical protein, conserved                               | Tb927.9.8330  | hypothetical protein                                                                                  |
| Tb927.2.5530  | Present in the outer mitochondrial membrane proteome 22-1     | Tb927.9.8350  | hypothetical protein, conserved                                                                       |
| Tb927.2.5610  | Present in the outer mitochondrial membrane proteome 22B      | Tb927.9.8500  | hypothetical protein                                                                                  |
| Tb927.2.5860  | hypothetical protein, conserved                               | Tb927.9.9300  | hypothetical protein, conserved                                                                       |
| Tb927.2.5870  | hypothetical protein, conserved                               | Tb927.9.9580  | tubulin tyrosine ligase protein, putative                                                             |
| Tb927.2.5950  | hypothetical protein, conserved                               | Tb927.9.9640  | hypothetical protein, conserved                                                                       |
| Tb927.3.1190  | hypothetical protein, conserved                               | Tb927.9.9870  | Kinesin-13 6, putative                                                                                |
| Tb927.3.2040  | kinesin, putative                                             |               |                                                                                                       |
| Tb927.3.2110  | Mitochondrial import inner membrane translocase subunit TIM50 |               |                                                                                                       |
| Tb927.3.2440  | AGC essential kinase 1                                        |               |                                                                                                       |
| Tb927.3.2640  | hypothetical protein, conserved                               |               |                                                                                                       |

**Supplemental Table S1B. Proteins in the DRC1p proximity proteome that were identified in prior flagellum proteome studies.**

| <b>Accession</b> | <b>Description</b>                                  | <b>Accession</b> | <b>Description</b>                                   |
|------------------|-----------------------------------------------------|------------------|------------------------------------------------------|
| Tb927.1.2100     | Calpain-like protein 1.1                            | Tb927.3.1420     | hypothetical protein, conserved                      |
| Tb927.1.2120     | Calpain-like protein CALP1.3                        | Tb927.3.1670     | hypothetical protein, conserved                      |
| Tb927.1.2670     | paralyzed flagella 16                               | Tb927.3.1740     | hypothetical protein, conserved                      |
| Tb927.1.2770     | hypothetical protein, conserved                     | Tb927.3.1770     | leucine-rich repeat protein (LRRP), putative         |
| Tb927.1.4180     | leucine-rich repeat protein (LRRP), putative        | Tb927.3.1850     | CMGC/MAPK protein kinase, putative                   |
| Tb927.1.4340     | hypothetical protein, conserved                     | Tb927.3.1900     | conserved protein, unknown function                  |
| Tb927.1.4470     | hypothetical protein, conserved                     | Tb927.3.2070     | hypothetical protein, conserved                      |
| Tb927.1.750      | Metal-binding domain-containing protein             | Tb927.3.2600     | ATP-dependent DEAD/H RNA helicase, putative          |
| Tb927.1.990      | Enkuring domain-containig protein                   | Tb927.3.3000     | Putative intraflagellar transport protein C3         |
| Tb927.10.10630   | hypothetical protein, conserved                     | Tb927.3.3200     | Domain of unknown function (DUF4586), putative       |
| Tb927.10.11080   | paraflagellar rod protein                           | Tb927.3.3560     | U-box domain containing protein, putative            |
| Tb927.10.11250   | Coiled-coil domain-containing protein 40 homolog    | Tb927.3.3690     | flagellar radial spoke protein-like, putative        |
| Tb927.10.1130    | dynein arm light chain, axonemal, putative          | Tb927.3.4270     | hypothetical protein, conserved                      |
| Tb927.10.11310   | intraflagellar transport protein 57/55              | Tb927.3.4290     | Paraflagellar rod protein 1-1                        |
| Tb927.10.11340   | hypothetical protein, conserved                     | Tb927.3.4300     | Paraflagellar rod protein 1-2                        |
| Tb927.10.11580   | predicted WD40 repeat protein                       | Tb927.3.4310     | Paraflagellar rod protein 1-3                        |
| Tb927.10.1170    | intraflagellar transport protein 172                | Tb927.3.4330     | Paraflagellar rod protein 1-5                        |
| Tb927.10.11780   | hypothetical protein, conserved                     | Tb927.3.4320     | Paraflagellar rod protein 1-4                        |
| Tb927.10.11850   | WD domain, G-beta repeat, putative                  | Tb927.3.4500     | Fumarate hydratase class I, cytosolic                |
| Tb927.10.12130   | Ubiquitin family, putative                          | Tb927.3.4750     | Aminopeptidase M1, putative                          |
| Tb927.10.13550   | hypothetical protein, conserved                     | Tb927.3.4960     | kinesin, putative                                    |
| Tb927.10.13780   | Glycogen synthase kinase 3 short                    | Tb927.3.4970     | hypothetical protein, conserved                      |
| Tb927.10.13960   | paralyzed flagella protein 20                       | Tb927.3.4980     | hypothetical protein, conserved, frameshift          |
| Tb927.10.1400    | hypoxanthine-guanine phosphoribosyltransferase      | Tb927.3.5020     | Flagellar Member 6                                   |
| Tb927.10.14000   | aconitase                                           | Tb927.3.5310     | paraflagellar rod protein                            |
| Tb927.10.14340   | hypothetical protein, conserved                     | Tb927.3.5490     | Putative intraflagellar transport protein B2         |
| Tb927.10.14460   | leucine-rich repeat protein (LRRP), putative        | Tb927.3.5510     | hypothetical protein, conserved                      |
| Tb927.10.14470   | intraflagellar transport protein 140                | Tb927.3.880      | Ankyrin repeats (3 copies), putative                 |
| Tb927.10.14490   | hypothetical protein, conserved                     | Tb927.3.930      | dynein heavy chain, putative                         |
| Tb927.10.1450    | plectin, putative                                   | Tb927.4.1680     | ZFP family member, putative                          |
| Tb927.10.14560   | TPR repeat, putative                                | Tb927.4.1740     | Component of motile flagella 41                      |
| Tb927.10.14570   | kinesin motor domain containing protein, putative   | Tb927.4.1890     | hypothetical protein, conserved                      |
| Tb927.10.14610   | leucine-rich repeat protein (LRRP), putative        | Tb927.4.2140     | Component of motile flagella 8                       |
| Tb927.10.14980   | intraflagellar transport protein 52                 | Tb927.4.2300     | hypothetical protein, conserved                      |
| Tb927.10.14990   | intraflagellar transport protein 80                 | Tb927.4.2400     | hypothetical protein, conserved                      |
| Tb927.10.15000   | hypothetical protein, conserved                     | Tb927.4.2600     | SUMO-interacting motif-containing protein            |
| Tb927.10.15280   | Domain of Unknown Function (DUF1042), putative      | Tb927.4.2740     | p25-alpha, putative                                  |
| Tb927.10.15390   | Flagellum attachment zone protein 7                 | Tb927.4.2920     | hypothetical protein, conserved                      |
| Tb927.10.15770   | hypothetical protein, conserved                     | Tb927.4.3620     | serine threonine-protein phosphatase PP1, putative   |
| Tb927.10.1890    | cysteine peptidase, Clan CA, family C2, putative    | Tb927.4.4370     | hypothetical protein, conserved                      |
| Tb927.10.1970    | CHAT domain containing protein, putative            | Tb927.4.5000     | TerD domain containing protein, putative             |
| Tb927.10.2190    | Protein of unknown function (DUF667), putative      | Tb927.4.5340     | Flagellum attachment zone protein 11                 |
| Tb927.10.2380    | Tetratricopeptide repeat, putative                  | Tb927.4.5380     | Cilia- and flagella-associated protein 43            |
| Tb927.10.2640    | intraflagellar transport protein 81                 | Tb927.4.560      | Cytoplasmic dynein 2 heavy chain (DYNC2H1), putative |
| Tb927.10.2880    | Voltage-dependent calcium channel subunit, putative | Tb927.4.620      | hypothetical protein, conserved                      |

|                |                                                                      |              |                                                               |
|----------------|----------------------------------------------------------------------|--------------|---------------------------------------------------------------|
| Tb927.10.2950  | hypothetical protein, conserved                                      | Tb927.4.660  | hypothetical protein, conserved                               |
| Tb927.10.3020  | hypothetical protein, conserved                                      | Tb927.4.670  | conserved protein, unknown function                           |
| Tb927.10.3130  | myotubularin-associated protein, putative                            | Tb927.4.870  | dynein heavy chain, putative                                  |
| Tb927.10.3310  | Component of motile flagella 76b                                     | Tb927.5.1100 | peroxisome targeting signal 1 receptor                        |
| Tb927.10.360   | hypothetical protein, conserved                                      | Tb927.5.1230 | hypothetical protein, conserved                               |
| Tb927.10.3820  | hypothetical protein, conserved                                      | Tb927.5.1680 | hypothetical protein, conserved                               |
| Tb927.10.4170  | hypothetical protein, conserved                                      | Tb927.5.1690 | hypothetical protein, conserved                               |
| Tb927.10.5230  | ADP-ribosylation factor-like protein 13, putative                    | Tb927.5.1900 | Outer dynein arm docking complex protein 1, putative          |
| Tb927.10.5260  | C2 domain containing protein, putative                               | Tb927.5.2270 | Component of motile flagella 44                               |
| Tb927.10.5350  | dynein heavy chain, putative                                         | Tb927.5.2820 | Serine/threonine-protein kinase NEK6, putative                |
| Tb927.10.5430  | Flagellar C1a complex subunit C1a-32, putative                       | Tb927.5.2850 | radial spoke protein RSP2, putative                           |
| Tb927.10.5790  | hypothetical protein, conserved                                      | Tb927.5.2950 | Component of motile flagella 3                                |
| Tb927.10.5940  | NEK family Serine/threonine-protein kinase, putative                 | Tb927.5.295b | retrotransposon hotspot (RHS) protein 1                       |
| Tb927.10.5980  | leucine-rich repeat protein (LRRP), putative                         | Tb927.5.3030 | Intraflagellar transport protein 121                          |
| Tb927.10.6350  | trypanin                                                             | Tb927.5.4390 | hypothetical protein, conserved                               |
| Tb927.10.6960  | hypothetical protein, conserved                                      | Tb927.5.440  | trans-sialidase, putative                                     |
| Tb927.10.7120  | hypothetical protein, conserved                                      | Tb927.5.4470 | hypothetical protein, conserved                               |
| Tb927.10.7230  | Flagellar Member 1                                                   | Tb927.5.4480 | paraflagellar rod component par4, putative                    |
| Tb927.10.7290  | Flagellar Member 2                                                   | Tb927.5.500  | hypothetical protein, conserved                               |
| Tb927.10.7350  | hypothetical protein, conserved                                      | Tb927.5.800  | casein kinase I, isoform 2                                    |
| Tb927.10.7510  | chromatin binding protein, putative                                  | Tb927.6.1660 | hypothetical protein, conserved                               |
| Tb927.10.7690  | Component of motile flagella 4                                       | Tb927.6.1720 | hypothetical protein, conserved                               |
| Tb927.10.7880  | Sperm tail/Sperm tail C-terminal domain containing protein, putative | Tb927.6.2220 | hypothetical protein, conserved                               |
| Tb927.10.8000  | hypothetical protein, conserved                                      | Tb927.6.3150 | Hydin                                                         |
| Tb927.10.830   | adenylate kinase, putative                                           | Tb927.6.3500 | endosomal trafficking protein RME-8, putative                 |
| Tb927.10.8780  | AAA domain containing protein, putative                              | Tb927.6.3670 | paraflagellar rod component, putative                         |
| Tb927.10.890   | kinesin, putative                                                    | Tb927.6.3820 | hypothetical protein, conserved                               |
| Tb927.10.8930  | paraflagellar rod component, putative                                | Tb927.6.3920 | hypothetical protein, conserved                               |
| Tb927.10.9080  | pteridine transporter, putative                                      | Tb927.6.410  | hypothetical protein, conserved                               |
| Tb927.10.9570  | paraflagellar rod component, putative                                | Tb927.6.4440 | RNA-binding protein 42 (RNA-binding motif protein 42)         |
| Tb927.10.9640  | hypothetical protein, conserved                                      | Tb927.6.4520 | Tumour suppressor, Mitostatin, putative                       |
| Tb927.10.9650  | Nucleoporin NUP152                                                   | Tb927.6.4610 | Ankyrin repeats (3 copies), putative                          |
| Tb927.11.10200 | hypothetical protein, conserved                                      | Tb927.6.4710 | calmodulin, putative                                          |
| Tb927.11.10380 | hypothetical protein, conserved                                      | Tb927.6.5030 | Component of motile flagella protein 46                       |
| Tb927.11.10430 | hypothetical protein, conserved                                      | Tb927.6.620  | hypothetical protein, conserved                               |
| Tb927.11.10540 | hypothetical protein, conserved                                      | Tb927.7.1310 | hypothetical protein, conserved                               |
| Tb927.11.10780 | Voltage-dependent anion channel, putative                            | Tb927.7.1430 | leucine-rich repeat protein (LRRP), putative                  |
| Tb927.11.1090  | calpain-like protein, putative                                       | Tb927.7.1830 | hypothetical protein, conserved                               |
| Tb927.11.10900 | Component of motile flagella 9                                       | Tb927.7.2120 | hypothetical protein, conserved                               |
| Tb927.11.11010 | hypothetical protein, conserved                                      | Tb927.7.2320 | cyclic nucleotide-binding domain containing protein, putative |
| Tb927.11.11220 | dynein heavy chain, putative                                         | Tb927.7.2790 | Component of motile flagella 10                               |
| Tb927.11.11280 | hypothetical protein, conserved                                      | Tb927.7.3370 | Intraflagellar transport protein 74, putative                 |
| Tb927.11.1150  | radial spoke protein 3                                               | Tb927.7.3560 | Component of motile flagella 7                                |
| Tb927.11.12540 | leucine-rich repeat protein (LRRP), putative                         | Tb927.7.3740 | SUMO-interacting motif-containing protein                     |
| Tb927.11.12560 | hypothetical protein                                                 | Tb927.7.4020 | protein phosphatase 2C, putative                              |
| Tb927.11.12840 | Domain of unknown function (DUF4486), putative                       | Tb927.7.4100 | Domain of unknown function (DUF4201), putative                |
| Tb927.11.12860 | cAMP response protein, putative                                      | Tb927.7.4110 | kinesin, putative                                             |
| Tb927.11.12860 | cAMP response protein, putative                                      | Tb927.7.4390 | threonine synthase, putative                                  |
| Tb927.11.13020 | calmodulin                                                           | Tb927.7.4510 | Domain of unknown function (DUF4201), putative                |

|                |                                                                        |              |                                                               |
|----------------|------------------------------------------------------------------------|--------------|---------------------------------------------------------------|
| Tb927.11.13030 | calmodulin                                                             | Tb927.7.4740 | hypothetical protein, conserved                               |
| Tb927.11.13040 | calmodulin                                                             | Tb927.7.4840 | hypothetical protein, conserved                               |
| Tb927.11.13050 | calmodulin                                                             | Tb927.7.5340 | cAMP response protein 3                                       |
| Tb927.11.1340  | Flagella connector protein 1                                           | Tb927.7.5660 | Outer dynein arm docking complex protein 2, putative          |
| Tb927.11.13460 | hypothetical protein, conserved                                        | Tb927.7.5940 | Protein Associated with Differentiation                       |
| Tb927.11.13670 | hypothetical protein, conserved                                        | Tb927.7.6280 | Domain of unknown function (DUF3508), putative                |
| Tb927.11.13900 | Centrin-5                                                              | Tb927.7.6290 | kinesin, putative                                             |
| Tb927.11.1420  | hypothetical protein, conserved                                        | Tb927.7.6340 | hypothetical protein, conserved                               |
| Tb927.11.14210 | conserved protein                                                      | Tb927.7.6640 | hypothetical protein, conserved                               |
| Tb927.11.14240 | WD domain, G-beta repeat, putative                                     | Tb927.7.6910 | Phosphatidylinositol 4-phosphate 5-kinase, putative           |
| Tb927.11.1430  | Component of motile flagella 2                                         | Tb927.7.6950 | hypothetical protein, conserved                               |
| Tb927.11.14440 | Pentatricopeptide repeat protein (PPR), putative                       | Tb927.7.6970 | paraflagellar rod protein, putative                           |
| Tb927.11.14450 | hypothetical protein, conserved                                        | Tb927.7.7200 | hypothetical protein, conserved                               |
| Tb927.11.14880 | Paraflagellar Rod Proteome Component 9, putative                       | Tb927.7.7240 | leucine-rich repeat protein (LRRP), putative                  |
| Tb927.11.14970 | hypothetical protein, conserved                                        | Tb927.7.7250 | Ankyrin repeats (3 copies), putative                          |
| Tb927.11.15100 | Tb5.20                                                                 | Tb927.7.750  | hypothetical protein, conserved                               |
| Tb927.11.15120 | hypothetical protein, conserved                                        | Tb927.7.920  | Inner arm dynein 5-1                                          |
| Tb927.11.15190 | Domain of unknown function (DUF4200), putative                         | Tb927.8.1050 | SUMO-interacting motif-containing protein                     |
| Tb927.11.15220 | hypothetical protein, conserved                                        | Tb927.8.1540 | hypothetical protein, conserved                               |
| Tb927.11.15370 | Importin subunit beta-4, putative                                      | Tb927.8.1550 | paraflagellar rod component, putative                         |
| Tb927.11.15730 | cyclic nucleotide-binding domain containing protein, putative          | Tb927.8.1560 | hypothetical protein, conserved                               |
| Tb927.11.16090 | Outer dynein arm docking complex protein 2, putative                   | Tb927.8.1950 | hypothetical protein, conserved                               |
| Tb927.11.16830 | Rab-like 5, small G protein                                            | Tb927.8.2130 | cyclic nucleotide-binding domain containing protein, putative |
| Tb927.11.16880 | leucine-rich repeat protein (LRRP), putative                           | Tb927.8.2160 | p-glycoprotein                                                |
| Tb927.11.16890 | Tetratricopeptide-like helical domain containing protein               | Tb927.8.2390 | hypothetical protein, conserved                               |
| Tb927.11.16900 | hypothetical protein                                                   | Tb927.8.2620 | SUMO-interacting motif-containing protein                     |
| Tb927.11.1740  | intraflagellar transport protein 88                                    | Tb927.8.2640 | ubiquitin-activating enzyme E1, putative                      |
| Tb927.11.2140  | cyclic nucleotide-binding domain containing protein, putative          | Tb927.8.3250 | dynein heavy chain, putative                                  |
| Tb927.11.2270  | inner dynein arm I1 intermediate chain, axonemal                       | Tb927.8.4050 | FLA1-binding protein                                          |
| Tb927.11.2430  | Cytoplasmic dynein 2 heavy chain (DYNC2H2), putative                   | Tb927.8.4400 | Outer dynein arm docking complex protein 1, putative          |
| Tb927.11.2540  | hypothetical protein, conserved                                        | Tb927.8.4460 | Domain of Unknown Function (DUF1042), putative                |
| Tb927.11.260   | Putative intraflagellar transport protein F6                           | Tb927.8.4580 | Basal body protein                                            |
| Tb927.11.2770  | hypothetical protein, conserved                                        | Tb927.8.4780 | Flagellar Member 3                                            |
| Tb927.11.2790  | Solute carrier (proton/amino acid symporter), TRAMD3 or PAT1, putative | Tb927.8.4870 | Component of motile flagella 6                                |
| Tb927.11.2830  | hypothetical protein, conserved                                        | Tb927.8.4970 | Paraflagellar rod protein 2-1                                 |
| Tb927.11.3250  | dynein heavy chain, putative                                           | Tb927.8.4980 | Paraflagellar rod protein 2-2                                 |
| Tb927.11.3360  | Component of motile flagella 22                                        | Tb927.8.4990 | Paraflagellar rod protein 2-3                                 |
| Tb927.11.3500  | Dpy-30 motif containing protein, putative                              | Tb927.8.5000 | Paraflagellar rod protein 2-4                                 |
| Tb927.11.3710  | hypothetical protein, conserved                                        | Tb927.8.5010 | Paraflagellar rod protein 2-5                                 |
| Tb927.11.3920  | hypothetical protein, conserved                                        | Tb927.8.5300 | hypothetical protein, conserved                               |
| Tb927.11.4000  | hypothetical protein, conserved                                        | Tb927.8.5460 | Flagellar calcium-binding 44 kDa protein                      |
| Tb927.11.4420  | hypothetical protein, conserved                                        | Tb927.8.610  | hypothetical protein, conserved                               |
| Tb927.11.4480  | Flagellar radial spoke protein 4/6                                     | Tb927.8.6260 | hypothetical protein, conserved                               |
| Tb927.11.450   | hypothetical protein, conserved                                        | Tb927.8.6270 | hypothetical protein, conserved                               |

|               |                                                     |               |                                                          |
|---------------|-----------------------------------------------------|---------------|----------------------------------------------------------|
| Tb927.11.4550 | Domain of unknown function (DUF4200), putative      | Tb927.8.640   | Dpy-30 motif containing protein, putative                |
| Tb927.11.4610 | protein kinase A regulatory subunit                 | Tb927.8.6660  | paraflagellar rod component, putative                    |
| Tb927.11.550  | Suppressor of clathrin deficiency 6, putative       | Tb927.8.7540  | hypothetical protein                                     |
| Tb927.11.5750 | SUMO-interacting motif-containing protein           | Tb927.8.7800  | hypothetical protein, conserved                          |
| Tb927.11.5890 | Domain of unknown function (DUF4505), putative      | Tb927.8.7950  | Flagellar Member 4                                       |
| Tb927.11.6050 | Flagellar-associated PapD-like, putative            | Tb927.8.8200  | Flagellar-associated protein 59, putative                |
| Tb927.11.6070 | hypothetical protein, conserved                     | Tb927.8.8300  | amino acid transporter, putative                         |
| Tb927.11.610  | hypothetical protein, conserved                     | Tb927.8.940   | Flagella connector protein 1                             |
| Tb927.11.6160 | eukaryotic release factor 3, putative               | Tb927.9.10370 | TAX-1                                                    |
| Tb927.11.6370 | leucine-rich repeat protein (LRRP), putative        | Tb927.9.10890 | Regulatory subunit of type II PKA R-subunit, putative    |
| Tb927.11.6440 | hypothetical protein, conserved                     | Tb927.9.11230 | calmodulin-like protein, putative                        |
| Tb927.11.6460 | hypothetical protein, conserved                     | Tb927.9.11580 | glycosomal membrane protein                              |
| Tb927.11.6710 | predicted tetratricopeptide repeat (TPR) protein    | Tb927.9.11600 | glycosomal membrane protein                              |
| Tb927.11.6870 | 14-3-3 protein 2                                    | Tb927.9.12830 | hypothetical protein, conserved                          |
| Tb927.11.6920 | hypothetical protein, conserved                     | Tb927.9.12990 | hypothetical protein, conserved                          |
| Tb927.11.7240 | nexin-dynein regulatory complex 2                   | Tb927.9.13070 | Heat shock factor binding 1 domain-containing protein    |
| Tb927.11.7740 | dynein light chain, putative                        | Tb927.9.13440 | Flagellar Member 5                                       |
| Tb927.11.7940 | calmodulin, putative                                | Tb927.9.1350  | hypothetical protein, conserved                          |
| Tb927.11.8030 | hypothetical protein, conserved                     | Tb927.9.13820 | kinetoplastid membrane protein 11-3                      |
| Tb927.11.8160 | dynein heavy chain, putative                        | Tb927.9.13860 | kinetoplastid membrane protein 11-2                      |
| Tb927.11.9400 | hypothetical protein, conserved                     | Tb927.9.13920 | kinetoplastid membrane protein 11-1                      |
| Tb927.11.9440 | Component of motile flagella 63                     | Tb927.9.15050 | nexin-dynein regulatory complex 4                        |
| Tb927.2.1850  | Tetratricopeptide repeat, putative                  | Tb927.9.1600  | hypothetical protein, conserved                          |
| Tb927.2.240   | retrotransposon hot spot protein 5 (RHS5), putative | Tb927.9.1750  | Fibronectin type III domain containing protein, putative |
| Tb927.2.3020  | Component of motile flagella 76                     | Tb927.9.1880  | WD domain, G-beta repeat, putative                       |
| Tb927.2.4050  | hypothetical protein, conserved                     | Tb927.9.1980  | hypothetical protein, conserved                          |
| Tb927.2.4060  | Dynein intermediate chain 138                       | Tb927.9.2940  | hypothetical protein, conserved                          |
| Tb927.2.4330  | paraflagellar rod protein 5, putative               | Tb927.9.5040  | cAMP-specific phosphodiesterase                          |
| Tb927.2.4520  | hypothetical protein, conserved                     | Tb927.9.5100  | cAMP-specific phosphodiesterase                          |
| Tb927.2.4810  | Component of motile flagella 5                      | Tb927.9.5410  | hypothetical protein, conserved                          |
| Tb927.2.5270  | dynein heavy chain, putative                        | Tb927.9.6130  | calmodulin, putative                                     |
| Tb927.2.5760  | Flagellar Member 8                                  | Tb927.9.6290  | arginine kinase                                          |
| Tb927.3.1040  | hypothetical protein, conserved                     | Tb927.9.7180  | adenosine monophosphate deaminase, putative              |
| Tb927.3.1060  | cAMP Response Protein 4                             | Tb927.9.7470  | purine nucleoside transporter                            |
| Tb927.3.1110  | Putative intraflagellar transport protein A1        | Tb927.9.7550  | adenylosuccinate lyase, putative                         |
| Tb927.3.1200  | hypothetical protein, conserved                     | Tb927.9.7720  | predicted tetratricopeptide repeat protein               |
|               |                                                     | Tb927.9.8740  | Double RNA binding domain protein 3                      |
|               |                                                     | Tb927.9.8760  | hypothetical protein, conserved                          |
|               |                                                     | Tb927.9.9740  | AMP deaminase, putative                                  |
